# Supplementary material for: NE contribution to rebooting unconsciousness caused by midazolam
Source: eLife. 2024 Nov 20;13:RP97954. doi: 10.7554/eLife.97954 (PMC11578583; doi:10.7554/eLife.97954)
Supplement: Supplementary file 1. [file elife-97954-supp1.docx]

**Supplemental information**

**NE contribution to rebooting unconsciousness caused by midazolam**

LeYuan Gu1,2#, WeiHui Shao2#, Lu Liu1#, Qing Xu1#, YuLing Wang2#, JiaXuan Gu2#, Yue Yang2, ZhuoYue Zhang1, YaXuan Wu2, Yue Shen3, Qian Yu2, XiTing Lian1, Haixiang Ma5, YuanLi Zhang2, HongHai Zhang1,2,3,4*

1Department of Anesthesiology, Zhejiang University School of Medicine, Hangzhou, 310006, China

2Department of Anesthesiology, the Fourth Clinical School of Medicine, Zhejiang Chinese Medical University, Hangzhou, 310006, China

3Department of Anesthesiology, Affiliated Hangzhou First People's Hospital, Westlake University School of Medicine, Hangzhou, 310006, China

4Westlake Laboratory of Life Sciences and Biomedicine, Hangzhou, 310006, China

5Medical College of Jining Medical University, Ningji, 272067, Shandong, China

#These authors contributed equally to this work

Corresponding authors: HongHai Zhang

Email address: [zhanghonghai_0902@163.com](mailto:zhanghonghai_0902@163.com) & zhh0902@zju.edu.cn

ORCID: http://orcid.org/0000-0003-3530-2060

**Supplemental Table 1. Summary of experimental groups of C57B/6J mice**

| **Figure** | **Experimental groups** | **Numbers of mice** |
| --- | --- | --- |
| **Figure 1** | Midazolam (40mg/kg) | 7 |
| Midazolam (50mg/kg) | 8 |
| Midazolam (60mg/kg) | 8 |
| Midazolam (70mg/kg) | 8 |
| ELISA-Vehicle | 6 |
| ELISA-Midazolam (60mg/kg) | 6 |
| Vehicle | 8 |
| Atomoxetine (10mg/kg) | 8 |
| Atomoxetine (20mg/kg) | 8 |
| Vehicle | 6 |
| DSP-4 (3 days) | 6 |
| DSP-4 (10 days) | 6 |
| Vehicle+Vehicle | 6 |
| Vehicle+Atomoxetine | 6 |
| DSP-4 (3 days)+Atomoxetine | 6 |
| DSP-4 (10 days)+Atomoxetine | 6 |
| **Figure 2** | Midazolam (60mg/kg) | 6 |
| Vehicle | 6 |
| DSP-4 (10 days) | 6 |
| Vehicle+Vehicle | 6 |
| Vehicle+Atomoxetine | 6 |
| DSP-4 (10 days)+Atomoxetine | 6 |
| **Figure 3** | No light | 8 |
| 20min 2mW Photostimulation (PS) | 8 |
| 20min 4mW PS | 8 |
| No light | 7 |
| 10min 4mW PS | 7 |
| 20min 4mW PS | 7 |
| No PS | 7 |
| Left PS | 7 |
| Right PS | 7 |
| Bilateral PS | 7 |
| No PS | 6 |
| PS | 6 |
| Vehicle | 6 (male) |
| CNO (0.1mg/kg) | 6 (male) |
| CNO (0.2mg/kg) | 6 (male) |
| Vehicle | 6 (female) |
| CNO (0.1mg/kg) | 6 (female) |
| CNO (0.2mg/kg) | 6 (female) |
| Vehicle | 6 (male) |
| Left Chemical stimulation (CS) | 6 (male) |
| Vehicle | 6 (female) |
| Left Chemical stimulation (CS) | 6 (female) |
| Vehicle | 6 (male) |
| Right CS | 6 (male) |
| Vehicle | 6 (female) |
| Right CS | 6 (female) |
| Vehicle | 6 (male) |
| Bilateral CS | 6 (male) |
| Vehicle | 6 (female) |
| Bilateral CS | 6 (female) |
| No CS | 6 (male) |
| CS | 6 (male) |
| No CS | 6 (female) |
| CS | 6 (female) |
| **Figure 4** | No PS | 6 |
| PS | 6 |
| No CNO | 6 (male) |
| CNO | 6 (male) |
| No CNO | 6 (female) |
| CNO | 6 (female) |
| **Figure 5** | No PS | 8 |
| PS | 8 |
| Vehicle | 8 (male) |
| CNO | 8 (male) |
| Vehicle | 8 (female) |
| CNO | 8 (female) |
| **Figure 6** | Vehicle | 8 |
| Phenylephrine (10mg/ml) | 8 |
| Phenylephrine (20mg/ml) | 8 |
| Vehicle | 8 |
| Prazosin (0.75mg/ml) | 8 |
| Prazosin (1.5mg/ml) | 8 |
| Vehicle | 9 |
| Clonidine (0.75mg/ml) | 9 |
| Clonidine (1.5mg/ml) | 9 |
| Vehicle | 8 |
| Yohimbine (15umol/ml) | 8 |
| Yohimbine (22.5umol/ml) | 8 |
| Yohimbine (30umol/ml) | 8 |
| Vehicle | 7 |
| Isoprenaline (2mg/ml) | 7 |
| Isoprenaline (4mg/ml) | 7 |
| Vehicle | 6 |
| Propranolol (2.5mg/ml) | 6 |
| Propranolol (5mg/ml) | 6 |
| Vehicle+Vehicle | 6 |
| Vehicle+Phenylephrine (20mg/ml) | 6 |
| Vehicle+Propranolol (5mg/ml) | 6 |
| Phenylephrine (20mg/ml)+Propranolol (5mg/ml) | 6 |
| No PS+Vehicle (ICV) | 7 |
| PS+Vehicle (ICV) | 7 |
| PS+Prazosin (ICV) | 7 |
| No PS+Prazosin (ICV) | 7 |
| No PS+Vehicle (VLPO) | 6 |
| PS+Vehicle (VLPO) | 6 |
| PS+Prazosin (VLPO) | 6 |
| No PS+Prazosin (VLPO) | 6 |
| Vehicle+Vehicle (ICV) | 6 |
| CNO+Vehicle (ICV) | 6 |
| CNO+Prazosin (ICV) | 6 |
| Vehicle+Prazosin (ICV) | 6 |
| Vehicle+Vehicle (VLPO) | 7 (male) |
| CNO+Vehicle (VLPO) | 7 (male) |
| CNO+Prazosin (VLPO) | 7 (male) |
| Vehicle+Prazosin (VLPO) | 7 (male) |
| Vehicle+Vehicle (VLPO) | 7 (female) |
| CNO+Vehicle (VLPO) | 7 (female) |
| CNO+Prazosin (VLPO) | 7 (female) |
| Vehicle+Prazosin (VLPO) | 7 (female) |
| **Figure 7** | Vehicle+No PS | 6 |
| Vehicle+PS | 6 |
| Prazosin+PS | 6 |
| Prazosin+No PS | 6 |
| Vehicle+No CNO | 6 |
| Vehicle+CNO | 6 |
| Prazosin+CNO | 6 |
| Prazosin+No CNO | 6 |
| **Figure 8** | Vehicle (ICV) | 7 |
| Gabazine (2ug/ml) (ICV) | 7 |
| Gabazine (4ug/ml) (ICV) | 7 |
| Vehicle (LC) | 6 |
| Gabazine (2ug/ml) (LC) | 6 |
| Gabazine (4ug/ml) (LC) | 6 |
| Vehicle+Vehicle | 6 |
| Gabazine+Vehicle | 6 |
| Vehicle+Prazosin | 6 |
| Gabazine+Prazosin | 6 |
| **Figure 9** | Sham | 6 |
| shRNA | 6 |
| Midazolam (40mg/kg) | 8 |
| Midazolam (50mg/kg) | 8 |
| Midazolam (60mg/kg) | 8 |
| Midazolam (70mg/kg) | 8 |
| Sham | 8 |
| shRNA | 8 |
| Sham | 6 |
| shRNA | 6 |
| Sham | 8 |
| shRNA+Vehicle | 8 |
| shRNA+Prazosin | 8 |

**Supplemental Table 2. Summary of the total number of C57B6J mice**

| **Figure** | **Numbers of mice** |
| --- | --- |
| **Figure 1** | **109 (male)** |
| **Figure 2** | **36 (male)** |
| **Figure 3** | **217 (151 male+66 female)** |
| **Figure 4** | **36 (24 male+12 female)** |
| **Figure 5** | **48 (44 male+16 female)** |
| **Figure 6** | **302 (274 male+28 female)** |
| **Figure 7** | **48 (male)** |
| **Figure 8** | **63 (male)** |
| **Figure 9** | **96 (male)** |
| **Total number of mice** | **955 (832 male+122 female)** |

**Supplemental Table3. Statistical analysis**

| **Figure** | **Comparisons** | **Test** |
| --- | --- | --- |
| **Figure 1** | Content of NE | Two-way ANOVA |
| Recovery time | Ordinary one-way ANOVA |
| Normalized TH+ cell number | Unpaired t-test |
| Quantification of c-fos(+)/TH(+) cells | Unpaired t-test |
| **Figure 2** | △F/F peak | Unpaired t-test |
| Quantification of c-fos(+)/TH(+) cells | Unpaired t-test |
| Recovery time | Ordinary one-way ANOVA |
| Normalized TH+ cell number | Unpaired t-test |
| **Figure 3** | Recovery time | Ordinary one-way ANOVA |
| Quantification of c-fos(+)/TH(+) cells | Unpaired t-test |
| **Figure 4** | Recovery time | Ordinary one-way ANOVA |
| △F/F peak | Unpaired t-test |
| **Figure 5** | Recovery time | Ordinary one-way ANOVA |
| **Figure 6** | Recovery time | Ordinary one-way ANOVA |
| **Figure 7** | Delta wave | Two-way ANOVA |
| Theta wave | Two-way ANOVA |
| Alpha wave | Two-way ANOVA |
| Beta wave | Two-way ANOVA |
| Gamma wave | Two-way ANOVA |
| **Figure 8** | Recovery time | Ordinary one-way ANOVA |
| △F/F peak | Unpaired t-test |
| **Figure 9** | Quantification of  GABAA-R(+)/TH(+) cells | Unpaired t-test |
| Recovery time | Ordinary one-way ANOVA |
| △F/F peak | Unpaired t-test |

**Supplemental Table 4. Reagent or resource**

| **Reagent or resource** | **Source** | **Identifier** |
| --- | --- | --- |
| **Antibodies** |  |  |
| Rabbit anti-c-fos | Cell Signaling Technology | 2250S |
| Mouse anti-TH | Merck-Millipore | MAB318 |
| Rabbit anti-TH | Merck-Millipore | MAB152 |
| Mouse anti-GABAA-R | Abcam | ab94585 |
| Donkey anti-mouse Alexa 546 | Thermo Fisher Scientific | A10036 |
| Donkey anti-mouse Alexa 488 | Thermo Fisher Scientific | A21202 |
| Goat anti-rabbit Cy5 | Thermo Fisher Scientific | A10523 |
| Donkey anti-rabbit Alexa 488 | Thermo Fisher Scientific | A21206 |
| Donkey anti-rabbit Alexa 546 | Thermo Fisher Scientific | A10040 |
| **Bacterial and virus strains** |  |  |
| rAAV-Dbh-GCaMP6m-WPRE-hGH pA | Brain VTA Technology Co., Ltd. | N/A |
| rAAV-Ef1α-DIO-hM3D(Gq)-mCherry | Brain VTA Technology Co., Ltd. | N/A |
| rAAV-Ef1α-DIO-hChR2(H134R)-EYFP | Brain VTA Technology Co., Ltd. | N/A |
| rAAV-mTh-NLS-CRE-WPRE-SV40 polyA | Brain VTA Technology Co., Ltd. | N/A |
| rAAV-Dbh-EGFP-S'miR-30a-shRNA(GABAA receptor)-3’-miR30a-WPREs | Brain VTA Technology Co., Ltd. | N/A |
| rAAV-Dbh-CRE-WPRE-hGH pA | Brain VTA Technology Co., Ltd. | N/A |
| **Chemicals, peptides, and recombinant proteins** | |  |
| Atomoxetine | Sigma-Aldrich | Ca#Y0001586 |
| DSP-4 | Sigma-Aldrich | C8417 |
| Enzyme-linked immunosorbent assay kit | Yan Sheng Biological Technology Co., Ltd | YS-M195 |
| Midazolam | Jiangsu Nhwa Pharmaceutical Co., Ltd | N/A |
| Gabazine | MedChemExpress | HY-103533 |
| Phenylephrine | MedChemExpress | HY-B0471 |
| Prazosin | MedChemExpress | HY-B0193 |
| Clonidine | MedChemExpress | HY-B0409 |
| Yohimbine | Aladdin | Y111137 |
| Isoprenaline | Sigma-Aldrich | [I5627](https://www.sigmaaldrich.cn/CN/zh/product/sigma/i5627) |
| Propranolol | MedChemExpress | HY-B0573 |
| Clozapine N-oxide (CNO) | MedChemExpress | HY-17366 |
| **Experimental models: Organisms/strains** | | |
| C57BL/6J mice | the Animal Center of Zhejiang University School of Medicine | N/A |
| **Software and algorithms** |  |  |
| ImageJ | NIH, Bethesda, MD, USA | https://imagej.nih.gov/ij/ |

**Supplemental Videos**

| **Videos** | **Content** | **Related Figure** |
| --- | --- | --- |
| **Optogenetic experiments** | | **Figure 3** |
| **Video 1** | An example of a C57BL/6J mouse intervened with midazolam, and without photostimulation to LC, demonstrating the long recovery time. |
| **Video 2** | An example of a C57BL/6J mouse intervened with midazolam, and with photostimulation to LC, demonstrating the shorter recovery time. |
| **Chemogenetic experiments** | |
| **Video 3** | An example of a male C57BL/6J mouse intervened with midazolam, and without the chemogenetic activation of the LCNE neurons, demonstrating the long recovery time. |
| **Video 4** | An example of a male C57BL/6J mouse intervened with midazolam, and with the chemogenetic activation of the LCNE neurons, demonstrating the shorter recovery time |
| **Video 5** | An example of a female C57BL/6J mouse intervened with midazolam, and without the chemogenetic activation of the LCNE neurons, demonstrating the long recovery time. |
| **Video 6** | An example of a female C57BL/6J mouse intervened with midazolam, and with the chemogenetic activation of the LCNE neurons, demonstrating the shorter recovery time. |
| **EEG experiments** | | **Figure 7** |
| **Video 7** | An example of a C57BL/6J mouse intervened with midazolam, without photostimulation to LC, and with ICV injection of the vehicle, recording EEG, demonstrating the long recovery time. |
| **Video 8** | An example of a C57BL/6J mouse intervened with midazolam, with photostimulation to LC, and with ICV injection of the vehicle with EEG recordings to reverse the effects of photostimulation, demonstrating the shorter recovery time. |
| **Video 9** | An example of a C57BL/6J mouse intervened with midazolam, with photostimulation to LC with ICV injection of prazosin with EEG recordings to reverse the effects of photostimulation, demonstrating the shorter recovery time. |
| **Video 10** | An example of a C57BL/6J mouse intervened with midazolam, without the chemogenetic activation of the LCNE neurons with ICV injection of the vehicle, recording EEG, demonstrating the long recovery time. |
| **Video 11** | An example of a C57BL/6J mouse intervened with midazolam, with the chemogenetic activation of the LCNE neurons with ICV injection of the vehicle, recording EEG, demonstrating the shorter recovery time. |
| **Video 12** | An example of a C57BL/6J mouse intervened with midazolam, with the chemogenetic activation of the LCNE neurons with ICV injection of prazosin with EEG recordings to reverse the effects of chemogenetic activation, demonstrating the long recovery time. |
| **LCNE neurons GABAA-R knockdown experiments** | | **Figure 9** |
| **Video 13** | An example of a C57BL/6J mouse intervened with midazolam, and without knocking down GABAA-R on the LCNE neurons. |
| **Video 14** | An example of a C57BL/6J mouse intervened with midazolam, and with knocking down GABAA-R on the LCNE neurons, demonstrating the shorter recovery time. |
| **Video 15** | An example of a C57BL/6J mouse intervened with midazolam, and with knocking down GABAA-R on the LCNE neurons without VLPO microinjection of the prazosin, demonstrating the shorter recovery time. |
| **Video 16** | An example of a C57BL/6J mouse intervened with midazolam, and with knocking down GABAA-R on the LCNE neurons with VLPO microinjection of the prazosin, demonstrating the long recovery time. |
